# Supplementary material
Source: bioRxiv or medRxiv preprint supplement (https://www.biorxiv.org/highwire/filestream/7922/field_highwire_adjunct_files/0/029538-1.pdf)
Supplement: Supplementary file [file 029538-1.pdf]

| Dataset                  | 1     | 2     | 3    | 4    | 5     | 6     | 7    | 8     | 9     | 10    | 11    | 12    | 13   | 14    | 15    |
|--------------------------|-------|-------|------|------|-------|-------|------|-------|-------|-------|-------|-------|------|-------|-------|
| $\sigma \in [0.01, 100]$ | 84.46 | 48.48 | 9.39 | 38.6 | 93.94 | 64.81 | 52.6 | 80.29 | 68.53 | 21.44 | 65.62 | 11.04 | 4.72 | 80.06 | 82.03 |
| Feature $\in [2, 10]$    | 6     | 6     | 2    | 2    | 4     | 2     | 2    | 3     | 5     | 4     | 4     | 5     | 9    | 2     | 4     |
| $\beta \in [0.01, 100]$  | 9.84  | 4.77  | 6.54 | 2.62 | 0.3   | 4.44  | 0.56 | 8.84  | 5.23  | 4.22  | 6.53  | 1.35  | 3.23 | 6.65  | 8.01  |

Table 1: Optimal values of MMCC parameters for 15 two-class datasets

| Dataset                  | 16   | 17    | 18    | 19    | 20    | 21    | 22    | 23    | 24   | 25     |
|--------------------------|------|-------|-------|-------|-------|-------|-------|-------|------|--------|
| $\sigma \in [0.01, 100]$ | 6.63 | 96.61 | 59.31 | 29.25 | 31.52 | 65.92 | 72.78 | 20.63 | 0.33 | 88.65  |
| Feature $\in [2, 10]$    | 7    | 2     | 8     | 3     | 6     | 2     | 7     | 5     | 8    | 29     |
| $\beta \in [0.01, 100]$  | 7.54 | 9.08  | 7.15  | 35.98 | 6.89  | 0.89  | 19.03 | 14.99 | 8.44 | 29.041 |

Table 2: Optimal values of MMCC parameters for 10 multi-class datasets

| Dataset | 1    | 2    | 3    | 4      | 5      | 6     | 7    | 8     | 9    | 10   | 11   | 12   | 13     | 14      | 15     |
|---------|------|------|------|--------|--------|-------|------|-------|------|------|------|------|--------|---------|--------|
| MMCC    | 0.44 | 2.21 | 0.5  | 0.07   | 0.08   | 0.03  | 0.01 | 0.01  | 0.03 | 0.02 | 0.02 | 0.22 | 0.18   | 0.23    | 0.22   |
| MIM     | 0.54 | 0.74 | 0.69 | 0.28   | 0.34   | 0.23  | 0.06 | 0.06  | 0.04 | 0.04 | 0.03 | 0.3  | 0.2    | 1.75    | 0.53   |
| MRMR    | 0.44 | 1.23 | 0.77 | 105.04 | 114.3  | 60.96 | 0.18 | 0.140 | 0.14 | 0.04 | 0.16 | 0.35 | 1669.5 | 0       | 204.63 |
| CMIM    | 0.11 | 0.26 | 0.24 | 120.87 | 116.05 | 70.5  | 0.03 | 0.03  | 0.01 | 0.01 | 0.16 | 0.06 | 165.57 | 1418.78 | 140.62 |
| JMI     | 0.9  | 2.23 | 1.11 | 1.64   | 3.31   | 0.81  | 0.04 | 0.04  | 0.07 | 0.03 | 0.05 | 0.47 | 2.58   | 6.74    | 3.9    |

Table 3: The time (in seconds) comparison of MMCC, MIM [36], MRMR [37], CMIM [38] and JMI [39] on 15 two-class datasets.

| Dataset | 16   | 17   | 18    | 19   | 20   | 21      | 22     | 23    | 24   | 25   |
|---------|------|------|-------|------|------|---------|--------|-------|------|------|
| MMCC    | 0.07 | 0.01 | 0.006 | 2.07 | 0.58 | 0.05    | 0.43   | 0.70  | 0.89 | 1.13 |
| MIM     | 0.15 | 0.08 | 0.01  | 4.57 | 6.34 | 0.57    | 0.43   | 0.63  | 0.56 | 3.85 |
| MRMR    | 0.21 | 0.08 | 0.03  | NA*  | NA   | NA      | 75.78  | 24.66 | 0.75 | NA   |
| CMIM    | 0.04 | 0.05 | 0.03  | NA   | NA   | 1018.98 | 187.97 | 89.07 | 0.15 | NA   |
| JMI     | 0.39 | 0.04 | 0.01  | NA   | NA   | 5.15    | 6.29   | 12.05 | 1.83 | NA   |

\* indicates the *out of memory* error while running the program

Table 4: The time (in seconds) comparison of MMCC, MIM [36], MRMR [37], CMIM [38] and JMI [39] on 10 multi-class datasets.

| Dataset | 1     | 2     | 3     | 4     | 5     | 6     | 7     | 8     | 9     | 10    | 11   | 12    | 13    | 14    | 15    |
|---------|-------|-------|-------|-------|-------|-------|-------|-------|-------|-------|------|-------|-------|-------|-------|
| ANHD    | 0.007 | 0.007 | 0.008 | 0.014 | 0.025 | 0.025 | 0.041 | 0.041 | 0.083 | 0.083 | 0.09 | 0.008 | 0.050 | 0.014 | 0.014 |

(a) ANHD on two-class datasets

| Dataset | 16    | 17    | 18  | 19    | 20    | 21    | 22    | 23    | 24    | 25    |
|---------|-------|-------|-----|-------|-------|-------|-------|-------|-------|-------|
| ANHD    | 0.025 | 0.044 | 0.7 | 0.003 | 0.014 | 0.020 | 0.014 | 0.008 | 0.008 | 0.014 |

(b) ANHD on multi-class datasets

Table 5: Exploring the stability of 15 two-class (above) and 10 multi-class (bottom) datasets via Average Normalized Hamming Distance (ANHD) [40].

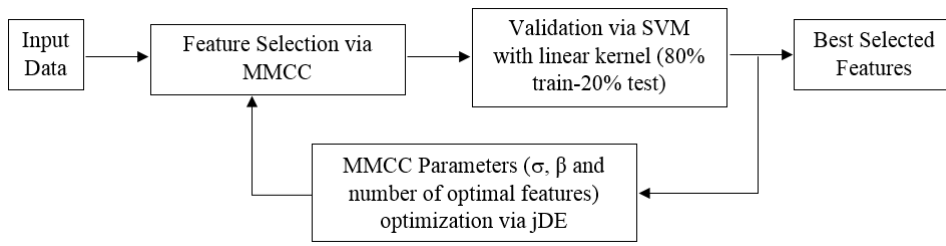

Figure 1: The procedure of MMCC for selection optimal parameters and features.

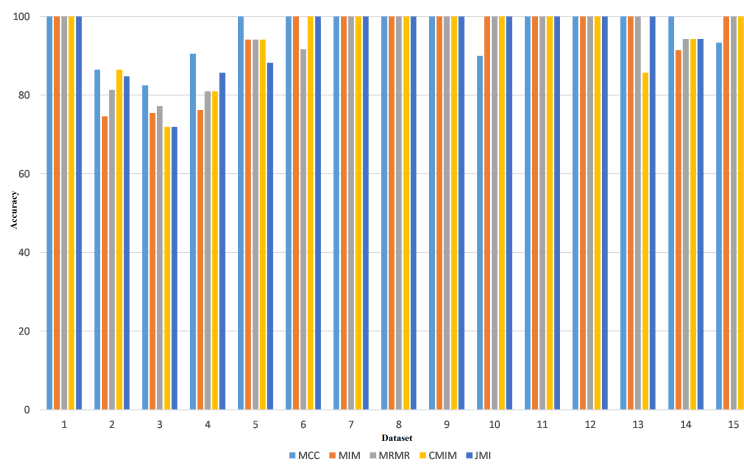

Figure 2: Maximum accuracy in 10,000 runs of SVM classification on selected features for 15 two-class datasets. The methods are MMCC, MIM [36], MRMR [37], CMIM [38] and JMI [39].

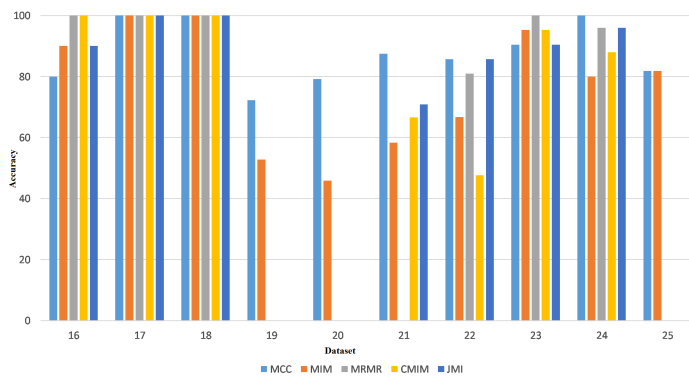

Figure 3: Maximum accuracy in 10,000 runs of SVM classification on selected features for 10 multi-class datasets. The methods are MMCC, MIM [36], MRMR [37], CMIM [38] and JMI [39].
